# Supplementary material for: Operationalising kangaroo Mother care before stabilisation amongst low birth Weight Neonates in Africa (OMWaNA): protocol for a randomised controlled trial to examine mortality impact in Uganda
Source: Springer Nature journal article supplement (doi:10.1186/s13063-019-4044-6), 2020-01-31
Supplement: MOESM2 [file 17614466]

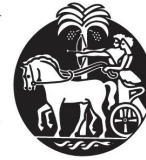

**Observational / Interventions Research Ethics Committee**

Prof Joy Lawn  
LSHTM

11 July 2019

Dear Prof Joy Lawn ,

**Study Title:** The OMWaNA Study: Operationalising kangaroo Mother care before stabilisation amongst low birth Weight Neonates in Africa: a multi-site randomised controlled trial to examine mortality impact in Uganda

**LSHTM ethics ref:** 16972

Thank you for your application for the above research, which has now been considered by the Interventions Committee.

**Confirmation of ethical opinion**

On behalf of the Committee, I am pleased to confirm a favourable ethical opinion for the above research on the basis described in the application form, protocol and supporting documentation, subject to the conditions specified below.

**Conditions of the favourable opinion**

Approval is dependent on local ethical approval having been received, where relevant.

**Approved documents**

The final list of documents reviewed and approved by the Committee is as follows:

| Document Type       | File Name                                 | Date       | Version |
|---------------------|-------------------------------------------|------------|---------|
| Other               | GCP_GCP Certificate (R2)_CT_12Dec17       | 12/11/2017 | n/a     |
| Other               | RETC_Certificate_2019                     | 09/01/2019 | n/a     |
| Information Sheet   | ICFphotography_OMWaNA_V1.0_8.2.19         | 08/02/2019 | 1.0     |
| Information Sheet   | ICFquali_OMWaNA_V1.0_English_8.02.19      | 08/02/2019 | 1.0     |
| Other               | Melissa Medvedev_GCP Certificate_5May2019 | 05/05/2019 | n/a     |
| Investigator CV     | Cally Tann_CV                             | 30/05/2019 | n/a     |
| Investigator CV     | Melissa Medvedev_CV                       | 30/05/2019 | n/a     |
| Investigator CV     | Peter Waiswa_CV                           | 30/05/2019 | n/a     |
| Investigator CV     | Joy Lawn_CV                               | 30/05/2019 | n/a     |
| Investigator CV     | Liz Allen_CV                              | 30/05/2019 | n/a     |
| Sponsor Letter      | 2019-MUU-234_Sponsor Confirmation         | 31/05/2019 | n/a     |
| Protocol / Proposal | OMWaNA protocol_V1.2_31.05.19_clean       | 31/05/2019 | 1.2     |
| Information Sheet   | ICF_OMWaNA_V1.1_English_31.05.19_clean    | 31/05/2019 | 1.1     |

**After ethical review**

The Chief Investigator (CI) or delegate is responsible for informing the ethics committee of any subsequent changes to the application. These must be submitted to the Committee for review using an Amendment form. Amendments must not be initiated before receipt of written favourable opinion from the committee.

The CI or delegate is also required to notify the ethics committee of any protocol violations and/or Suspected Unexpected Serious Adverse Reactions (SUSARs) which occur during the project by submitting a Serious Adverse Event form.

An annual report should be submitted to the committee using an Annual Report form on the anniversary of the approval of the study during the lifetime of the study.

At the end of the study, the CI or delegate must notify the committee using an End of Study form.

All aforementioned forms are available on the ethics online applications website and can only be submitted to the committee via the website at: <http://leo.lshtm.ac.uk>

Additional information is available at: [www.lshtm.ac.uk/ethics](http://www.lshtm.ac.uk/ethics)

Yours sincerely,

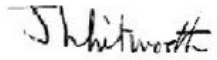

Professor Jimmy Whitworth  
Chair

[ethics@lshtm.ac.uk](mailto:ethics@lshtm.ac.uk)  
<http://www.lshtm.ac.uk/ethics/>

---

**Improving health worldwide**
