# Supplementary material for: Operationalising kangaroo Mother care before stabilisation amongst low birth Weight Neonates in Africa (OMWaNA): protocol for a randomised controlled trial to examine mortality impact in Uganda
Source: Springer Nature journal article supplement (doi:10.1186/s13063-019-4044-6), 2020-01-31
Supplement: MOESM4 [file 17614466]

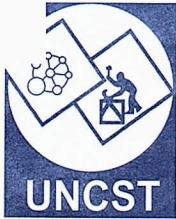

# Uganda National Council for Science and Technology

(Established by Act of Parliament of the Republic of Uganda)

Our Ref: HS 2645

30<sup>th</sup> August 2019

Prof. Joy Elizabeth Lawn  
Principal Investigator  
C/o MRC/UVRI & LSHTM Research Unit  
**Entebbe**

Dear Prof. Lawn,

**Re: Research Approval: The OMWaNA Study: Operationalizing Kangaroo Mother Care before Stabilization amongst Low Birth Weight Neonates in Africa: A Multi – Site Randomized Controlled Trial to Examine Mortality Impact in Uganda**

I am pleased to inform you that on **20/08/2019**, the Uganda National Council for Science and Technology (UNCST) approved the above referenced research project. The Approval of the research project is for the period of **20/08/2019 to 20/08/2022**.

Your research registration number with the UNCST is **HS 2645**. Please, cite this number in all your future correspondences with UNCST in respect of the above research project.

As Principal Investigator of the research project, you are responsible for fulfilling the following requirements of approval:

1. All co-investigators must be kept informed of the status of the research.
2. Changes, amendments, and addenda to the research protocol or the consent form (where applicable) must be submitted to the designated Research Ethics Committee (REC) or Lead Agency for re-review and approval **prior** to the activation of the changes. UNCST must be notified of the approved changes within five working days.
3. For clinical trials, all serious adverse events must be reported promptly to the designated local IRC for review with copies to the National Drug Authority.
4. Unanticipated problems involving risks to research subjects/participants or other must be reported promptly to the UNCST. New information that becomes available which could change the risk/benefit ratio must be submitted promptly for UNCST notification after review by the REC.
5. Only approved study procedures are to be implemented. The UNCST may conduct impromptu audits of all study records.

---

## LOCATION/CORRESPONDENCE

Plot 6 Kimera Road, Ntinda  
P.O.Box 6884  
KAMPALA, UGANDA

## COMMUNICATION

TEL: (256) 414 705500  
FAX: (256) 414-234579  
EMAIL: [info@uncst.go.ug](mailto:info@uncst.go.ug)  
WEBSITE: <http://www.uncst.go.ug>

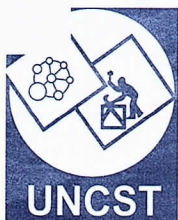

# Uganda National Council for Science and Technology

(Established by Act of Parliament of the Republic of Uganda)

6. An annual progress report and approval letter of continuation from the REC must be submitted electronically to UNCST. Failure to do so may result in termination of the research project.

Below is a list of documents approved with this application:

|    | Document Title                                | Language                    | Version | Version Date  |
|----|-----------------------------------------------|-----------------------------|---------|---------------|
| 1. | Research proposal                             | English                     | 1.1     | May 2019      |
| 2. | Informed Consent Form (ICF): The OMWaNA study | English, Luganda and Lusoga | 1.0     | February 2019 |
| 3. | ICF: Photography and medical images           | English, Luganda and Lusoga | 1.0     | February 2019 |

Yours sincerely,

Isaac Makhuwa

For: Executive Secretary

**UGANDA NATIONAL COUNCIL FOR SCIENCE AND TECHNOLOGY**

Copied to: Chair, Uganda Virus Research Institute, Research Ethics Committee

---

**LOCATION/CORRESPONDENCE**

Plot 6 Kimera Road, Ntinda  
P.O.Box 6884  
KAMPALA, UGANDA

**COMMUNICATION**

TEL: (256) 414 705500  
FAX: (256) 414-234579  
EMAIL: [info@uncst.go.ug](mailto:info@uncst.go.ug)  
WEBSITE: <http://www.uncst.go.ug>
